# Supplementary material for: Aurora B SUMOylation Is Restricted to Centromeres in Early Mitosis and Requires RANBP2
Source: MDPI journal article supplement (doi:10.3390/cells12030372), 2023-01-19
Supplement: s1 [file s1]

# Aurora B SUMOylation is Restricted to Centromeres in Early Mitosis and Requires RANBP2

Erica Di Cesare 1,2,†,‡, Sara Moroni 1,2,†,§, Jessica Bartoli 1,2,†,||, Michela Damizia 1,2,¶, Maria Giubettini 3, Carolin Koerner 4, Veronica Krenn 4,\*\*, Andrea Musacchio 4 and Patrizia Lavia 1,2,\*

1. *Institute of Molecular Biology and Pathology (IBPM), CNR National Research Council of Italy, 00185 Rome, Italy*

2. *Department of Biology and Biotechnology “Charles Darwin”, Sapienza University of Rome, 00185 Rome, Italy*

3. *CrestOptics, 00165 Rome, Italy*

4. *Max Planck Institute of Molecular Physiology, 44227 Dortmund, Germany*

\* Correspondence: patrizia.lavia@cnr.it, patrizia.lavia@uniroma1.it

† These authors contributed equally to this work.

‡ Present address: Stony Brook School of Medicine, Stony Brook, NY 11794, USA.

§ Present address: Special Product's Line SpA, 03012 Anagni, Italy.

|| Present address: Istituto di Ricerca in Biologia Molecolare, IRBM Science Park, 00071 Pomezia, Italy.

¶ Present address: Department of Cellular, Computational and Integrative Biology (CIBIO), University of Trento, 38123 Trento, Italy.

\*\* Present address: Department of Biotechnology and Biosciences, University of Milan-Bicocca, 20126 Milan, Italy.

**Running title:** Aurora B SUMOylation in early mitosis

**Keywords:** SUMOylation, Aurora B, in situ proximity ligation assay (isPLA), RANBP2, mitosis

**SUPPLEMENTARY TABLE S1. ANTIBODIES USED IN THIS WORK**

| <b>Immunofluorescence and PLA</b> |                    |                                                                                                                |
|-----------------------------------|--------------------|----------------------------------------------------------------------------------------------------------------|
| <b>PRIMARY</b>                    | <b>HOST</b>        | <b>SOURCE</b>                                                                                                  |
| alpha-tubulin                     | mouse              | T5178, Sigma-Aldrich                                                                                           |
| alpha-tubulin                     | rat                | ab6161, Abcam                                                                                                  |
| alpha-tubulin                     | chicken            | ab89984, Abcam                                                                                                 |
| Aurora B                          | rabbit             | ab2254, Abcam                                                                                                  |
| Aurora B                          | mouse              | 611082, Becton Dickinson                                                                                       |
| Aurora BphThr232                  | rabbit             | 636102, BioLegend                                                                                              |
| Aurora BphThr232                  | mouse              | 600-401-677S, Rockland                                                                                         |
| Borealin                          | rabbit             | ab74473, Abcam                                                                                                 |
| Borealin                          | mouse              | ab67126, Abcam                                                                                                 |
| CREST                             | human              | 15-234-0001 Antibodies Inc                                                                                     |
| CENP F                            | rabbit             | NB 500-101, Novus Biologicals                                                                                  |
| CENPA                             | mouse              | ab13939, Abcam                                                                                                 |
| CENP A phThr3                     | rabbit             | NL41, Millipore                                                                                                |
| gamma-tubulin                     | mouse              | T6557, Sigma-Aldrich                                                                                           |
| H3 phSer10                        | mouse              | 3H10, Millipore                                                                                                |
| INCENP                            | mouse              | ab23956, Abcam                                                                                                 |
| INCENP                            | mouse              | B-4, SC-376514, Santa Cruz Biotechnology Inc.                                                                  |
| RANBP2                            | mouse              | D-4 sc-74518, Santa Cruz Biotechnology Inc.                                                                    |
| SUMO2/3                           | mouse              | M114-3, MBL Life Science                                                                                       |
| TPX2                              | rabbit             | NB 500-179, Novus Biologicals                                                                                  |
| <b>SECONDARY</b>                  | <b>CONJUGATION</b> | <b>SOURCE</b>                                                                                                  |
| anti-mouse                        | Texas Red          | Vector                                                                                                         |
| anti-mouse IgG                    | AlexaFluor 647     | Jackson Imm.                                                                                                   |
| anti-mouse IgG                    | AMCA               | Jackson Imm.                                                                                                   |
| anti-mouse IgG                    | Rhodamine          | Jackson Imm                                                                                                    |
| anti-rabbit IgG                   | CY3                | Jackson Imm.                                                                                                   |
| anti-rabbit IgG                   | FITC               | Santa Cruz                                                                                                     |
| anti-chicken IgG                  | Alexa 647          | Jackson Imm.                                                                                                   |
| anti-human IgG di                 | AMCA               | Jackson Imm.                                                                                                   |
| anti-mouse/anti-rabbit            | CY 3.5             | <a href="http://www.olk.com/products/duolink/how-use-duolink">www.olk.com/products/duolink/how-use-duolink</a> |
| anti-mouse/anti-rabbit            | CY3                | <a href="http://www.olk.com/products/duolink/how-use-duolink">www.olk.com/products/duolink/how-use-duolink</a> |
| <b>Western immunoblotting</b>     |                    |                                                                                                                |
| <b>PRIMARY</b>                    | <b>HOST</b>        | <b>SOURCE</b>                                                                                                  |
| actin                             | goat               | I-19 sc1862, Santa Cruz Biotechnology Inc.                                                                     |
| alpha-tubulin                     | mouse              | B512, Sigma- Aldrich                                                                                           |
| Aurora B                          | rabbit             | N-ter 1-100, ab2254 Abcam                                                                                      |
| GFP                               | rabbit             | ab6556, Abcam                                                                                                  |
| GFP                               | mouse              | 11814460001, Roche                                                                                             |
| NUP153                            | mouse              | QE5 AB81463, Abcam                                                                                             |
| RANBP2                            | rabit              | N-20, sc-15442 Santa Cruz Biotechnology Inc.                                                                   |
| RANGAP1                           | mouse              | N-19, sc-1862 Santa Cruz Biotechnology Inc                                                                     |
| <b>SECONDARY</b>                  | <b>CONJUGATION</b> | <b>SOURCE</b>                                                                                                  |
| anti-rabbit IgG                   | HRP                | sc-2004, Santa Cruz Biotechnology Inc                                                                          |
| anti-mouse IgG                    | HRP                | sc-2005, Santa Cruz Biotechnology Inc                                                                          |
| anti-goat IgG                     | HRP                | sc-2354, Santa Cruz Biotechnology Inc                                                                          |

## SUPPLEMENTARY FIGURE LEGENDS

**Figure S1. Specificity controls for intramolecular PLA assays between Aurora B and SUMO2/3 peptides.** **A.** Positive controls for PLA reactions of Aurora B with established interacting partners, Borealin and INCENP. **B.** As a negative control, PLA amplification yielded no signal for the Aurora B and gamma-tubulin pair. **C.** RNA interference-mediated Borealin silencing in HeLa cells. After quantitative IF, the extent of Borealin depletion, relative to control cultures interfered with neutral siRNA (GL2), was quantified in the box plots (\*\*\*\*  $p < 0.0001$ , extremely significant difference; Mann-Whitney test, 60 counted cells / group, 2 experiments).

**Figure S2. Generation of stable cell lines expressing RNAi-resistant Aurora B<sup>WT</sup>-GFP and Aurora B<sup>K202R</sup>-GFP in a dox-inducible manner.** **A.** Map of wild-type and K202R mutant Aurora B: both are rendered RNAi-resistant by introducing three close synonymous substitutions in the coding sequence (double arrowhead line) and can therefore be expressed in an Aurora B-silenced background. The coding sequences also carry in-frame Myc and GFP tags cloned downstream of a dox-inducible promoter. **B.** Western blot analysis (40  $\mu$ g of protein extract per lane) of cells expressing either Aurora B<sup>WT</sup>-GFP or mutant Aurora B<sup>K202R</sup>-GFP RNAi-resistant sequences (78 KDa) probed with GFP antibody. – and + indicate the addition of Aurora-B specific siRNAs. A twin filter was probed with Aurora B antibody to control silencing of the endogenous Aurora B and selective expression of the constructs after dox induction in cells treated with Aurora B-specific siRNAs. Alpha-tubulin was used as a loading control. Only the regions where proteins of interest migrate are shown. **C.** Still images from video recorded cultures induced to express either wild-type or K202R Aurora B, monitored by the GFP signal appearance. **D.** Release from STLC-dependent inhibition of the kinesin kif11 activates Aurora B. IF to AurB<sup>phThr232</sup> shows that Aurora B activity is stimulated by STLC treatment (2 hours) and even further after STLC release (30 min) cells. The box-and-whiskers plot represent the distribution of AurB<sup>phThr232</sup> signals in individual cells from control (CTR) and STLC-released cultures (n, 80 cells, 2 experiments). Aurora B<sup>phThr232</sup> increased significantly in STLC release compared to CTR (\*\*,  $p < 0.01$ ).

**Figure S3. AuroraB<sup>K202R</sup> mutant interacts with CPC partners.** **A.** INCENP PLA products were assessed in cells silenced for the endogenous Aurora B and expressing Aurora B<sup>K202R</sup>: both Aurora B forms retain the ability to interact with INCENP. **B.** INCENP concentrates at centromeres in Aurora B<sup>WT</sup>-GFP-expressing metaphase cells, while being largely diffuse over DAPI-stained chromosomes in metaphase cells expressing AuroraB<sup>K202R</sup>-GFP. In anaphase and telophase both the Aurora B<sup>WT</sup>/INCENP and the AuroraB<sup>K202R</sup>/INCENP pairs localise at the midbody in an undistinguishable manner. **C.** Borealin signals concentrate at metaphase centromeres in cells interfered for the endogenous Aurora B and expressing Aurora B<sup>WT</sup>-GFP; in contrast, cells reconstituted with Aurora B<sup>K202R</sup>-GFP show impaired Borealin localisation at centromeres. All assays in the dox-inducible cell lines were repeated in 3 or 4 independent experiments.

**Figure S4. RANBP2 silencing in HeLa cells.** **A.** Protocol for RANBP2 silencing in HeLa cultures synchronised by thymidine arrest and release. Control cultures were treated with neutral siRNA, indicated as GL2(i). **B.** Western immunoblotting of protein extract (40  $\mu$ g per lane) shows that RANBP2-specific siRNAs depleted the cells of RANBP2 as well as SUMO-conjugated RANGAP1 (signals are quantified in C); the nucleoporin NUP153 used for control does not vary. Only the regions where proteins of interest migrate are shown. **D.** The panels show the enrichment in mitotic cells in synchronised cultures. Mitotic stages are identified from both their chromosome configuration (DAPI staining) and the spindle organisation (TPX2 staining). RANBP2 was homogeneously depleted in the interfered culture. 40x objective. **E.** High-resolution images showing a control metaphase, treated with neutral GL2 siRNA, with RANBP2 (green) at the spindle (TPX2, red) and at microtubule-attached kinetochores. Chromosomes are stained with DAPI. Below, TPX2 is unaffected in the RANBP2-interfered metaphase. 100 x objective.

**Figure S5.** RANBP2 silencing impairs Aurora B concentration at centromeres. **A.** In control cells interfered with neural siRNAs [GL2(i)], Aurora B IF signals (red) are centromere-restricted; in RANBP2-interfered cells, a chromosome-associated Aurora B fraction is evident in prometaphase and metaphase cells: the mask profile of DAPI (chromosomes) and Aurora B IF shows an almost total overlap in RANBP2-interfered panels. **B.** The histograms represent the percentage of cells displaying either centromere-restricted (CEN), or centromere/chromosome (CEN/CHROM) diffuse localisation of Aurora B in control and RANBP2-interfered samples. Differences are highly significant in prometaphase and metaphase cells (\*\*\*\*,  $p < 0.0001$ ). Aurora B localisation at the midbody in anaphase and telophase does not vary, with or without RANBP2 (ns, non significant difference). At least 80 cells/samples were counted in 3 experiments and the frequency of patterns were compared using the  $\chi^2$  test (two-sided). **C.** RANBP2 interference does not prevent the association of Aurora B with INCENP in PLA reactions.



### A. Positive PLA controls

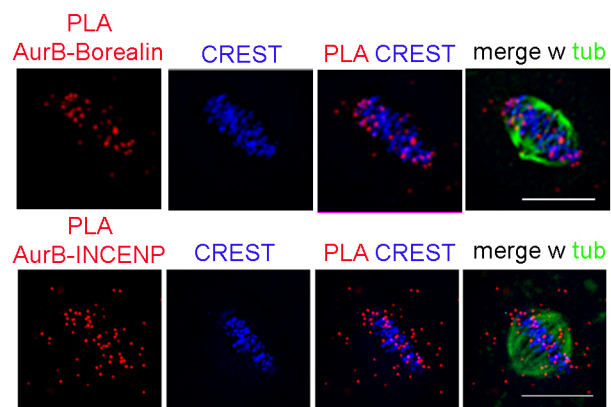

### B. Negative PLA control

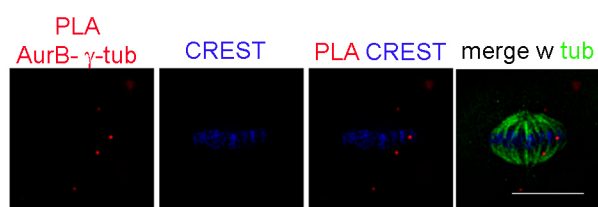

### C. Borealin interference control

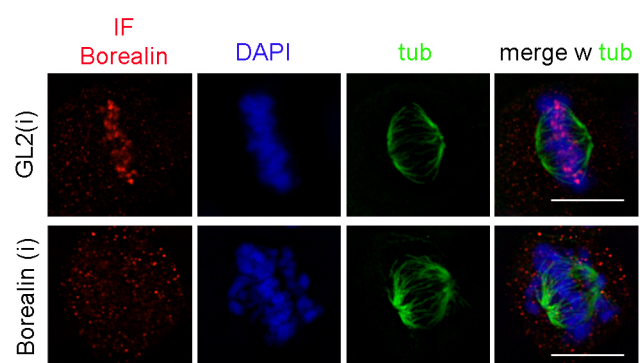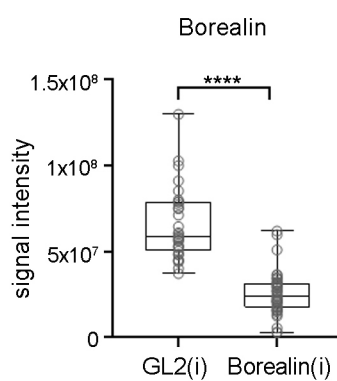

Figure S1

Figure S2

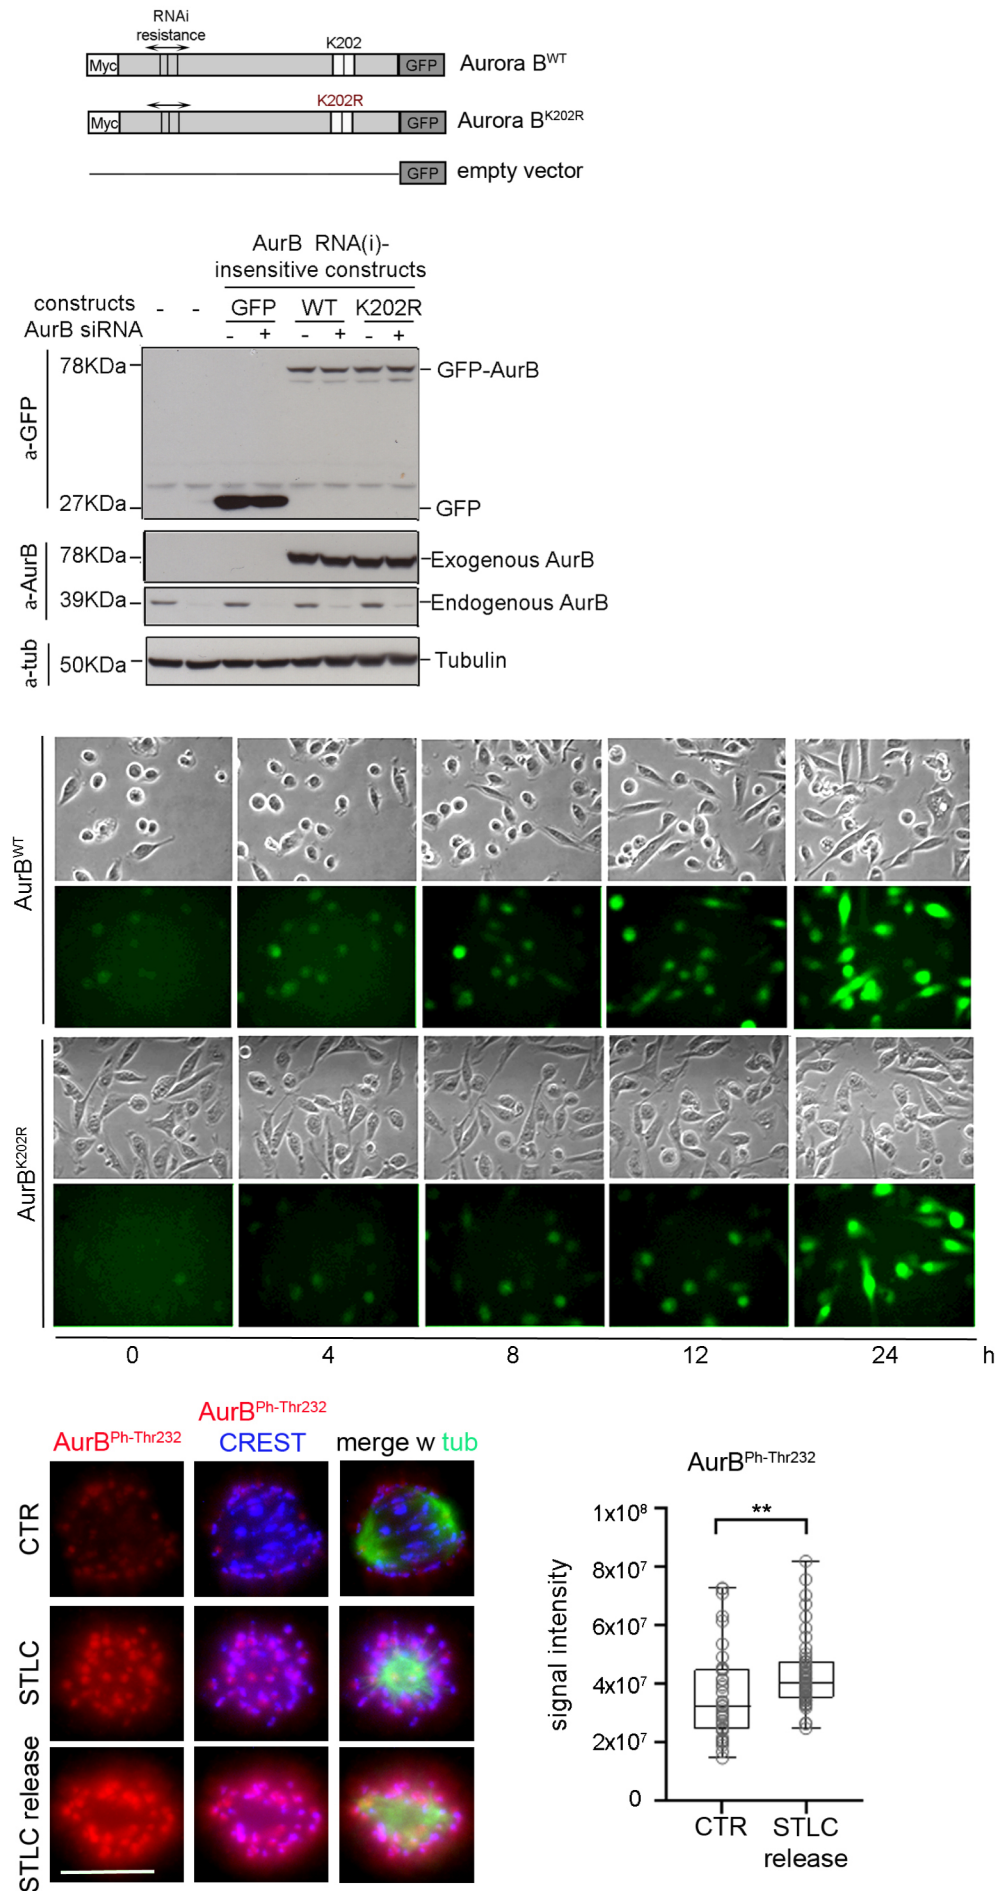

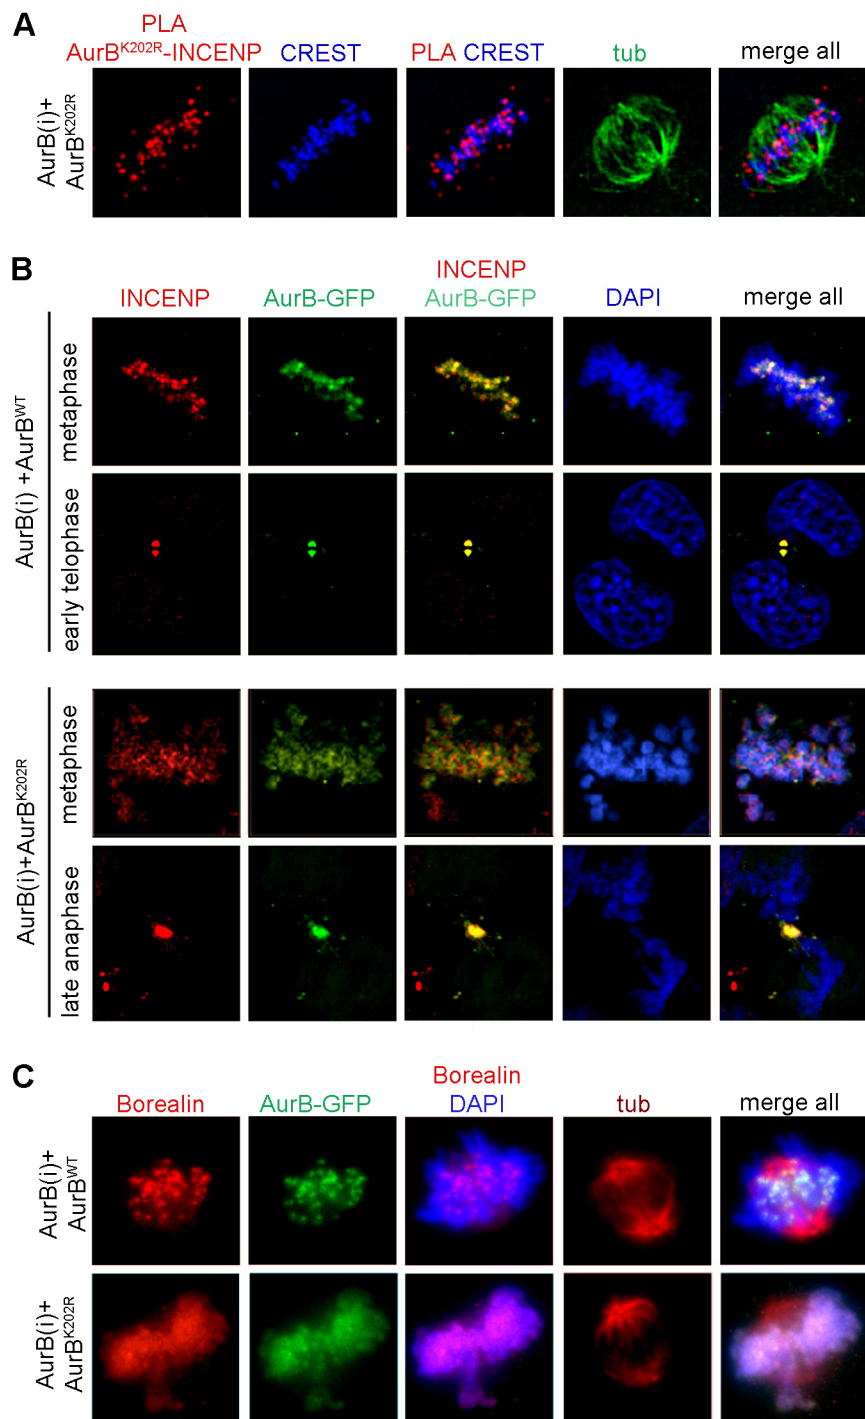

Figure S3

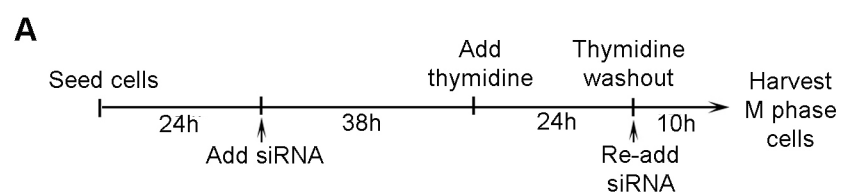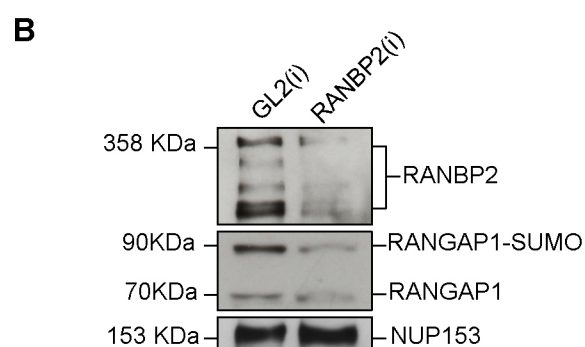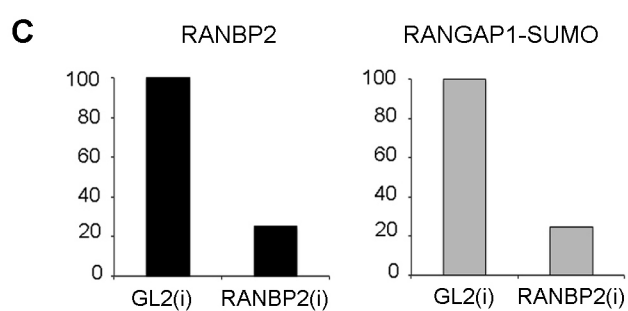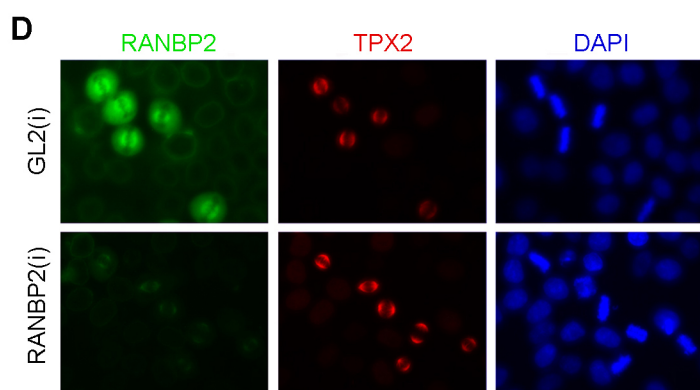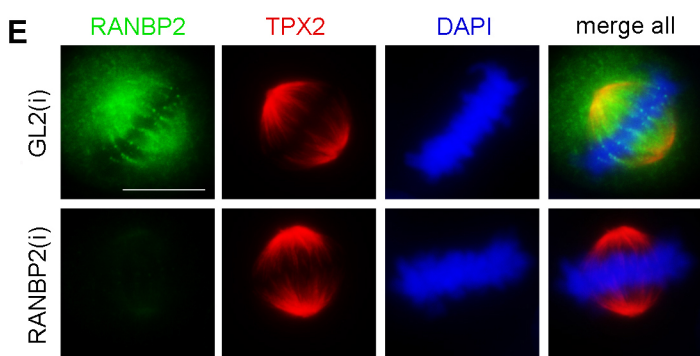

Figure S4

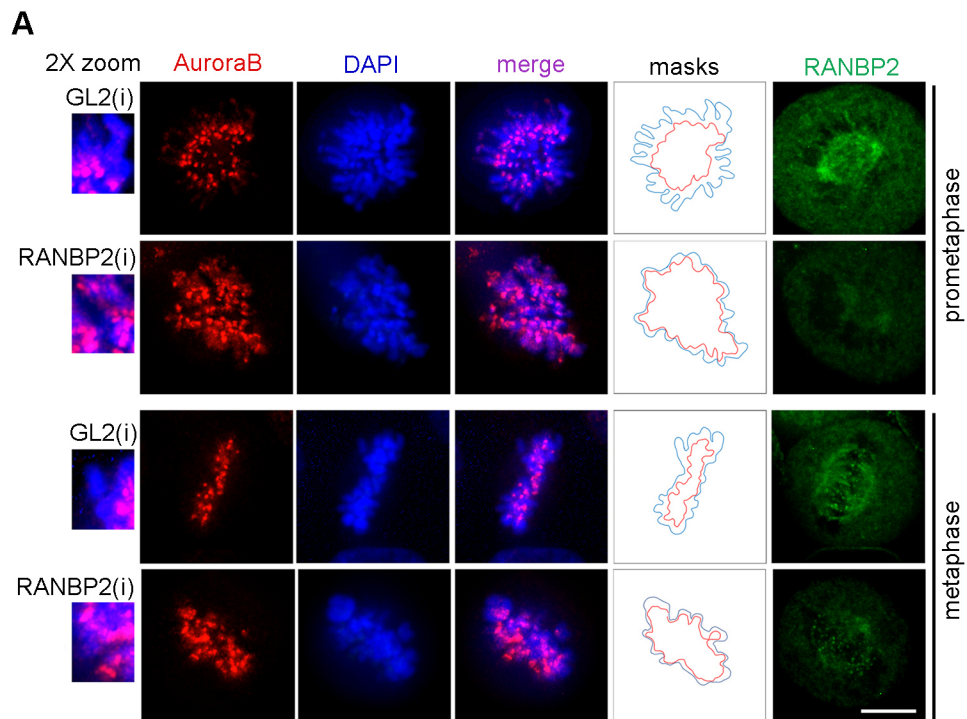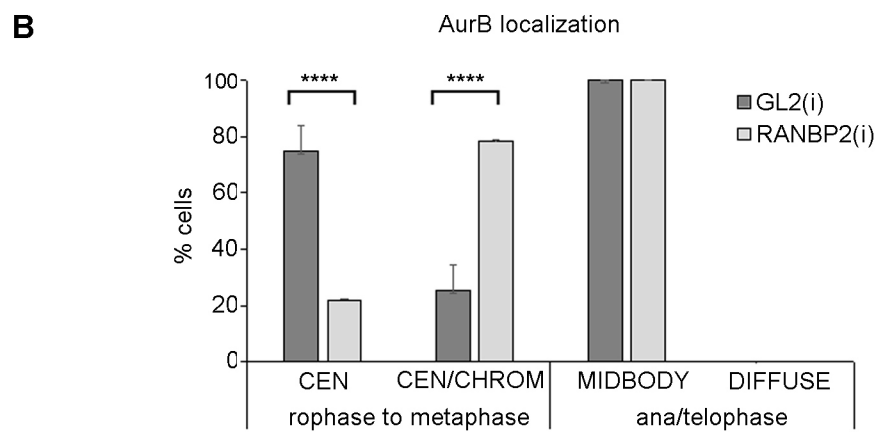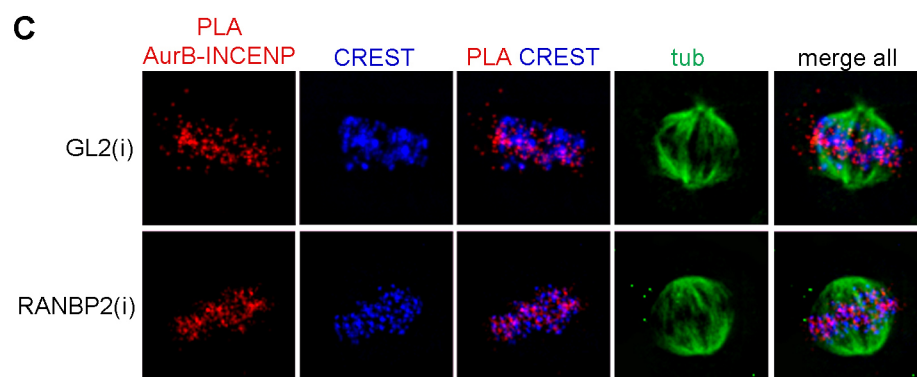

Figure S5
